# Supplementary material for: Less Is More? Repartnering and Completed Cohort Fertility in Finland
Source: Oxford University Press journal article supplement (doi:10.1215/00703370-10351787), 2022-11-22
Supplement: andersson_esm.pdf [file andersson_esm.pdf]

## **Appendix**

### **Less is more or more is more? Re-partnering and completed cohort fertility in Finland**

Linus Andersson, Marika Jalovaara, Caroline Uggla, and Jan Saarela

Note on Appendix figures A5 to A10: Figure A5 to Figure A10 provide various specifications to Figure 1. Model A in these figures uses the same specifications as in Figure 1, controlling only for birth cohort. Models B and C have different specifications. Previous research finds that the separated and the re-partnered population have fewer cumulated years with a partner than those in intact marriages/unions, and thus less in-union exposure when the risk of childbearing is greatest (Hoem et al. 2013). We therefore analyze how correlates of union dissolution and re-partnering may influence the association observed above. Model B account for group differences in union duration by age 46. Separated and re-partnered individuals start their first union at an earlier age than those who remain within a single union (Raley & Sweeney 2020), which provides time for childbirths in first and higher order unions. Model C adjusts for the age at first union among those who ever-partnered (note that never-partnered individuals are excluded in Model C). Moreover, a set of control variables are added as described in caption and in the methods section. In Figures A7 to A10, the data are restricted to those with childbearing first unions.

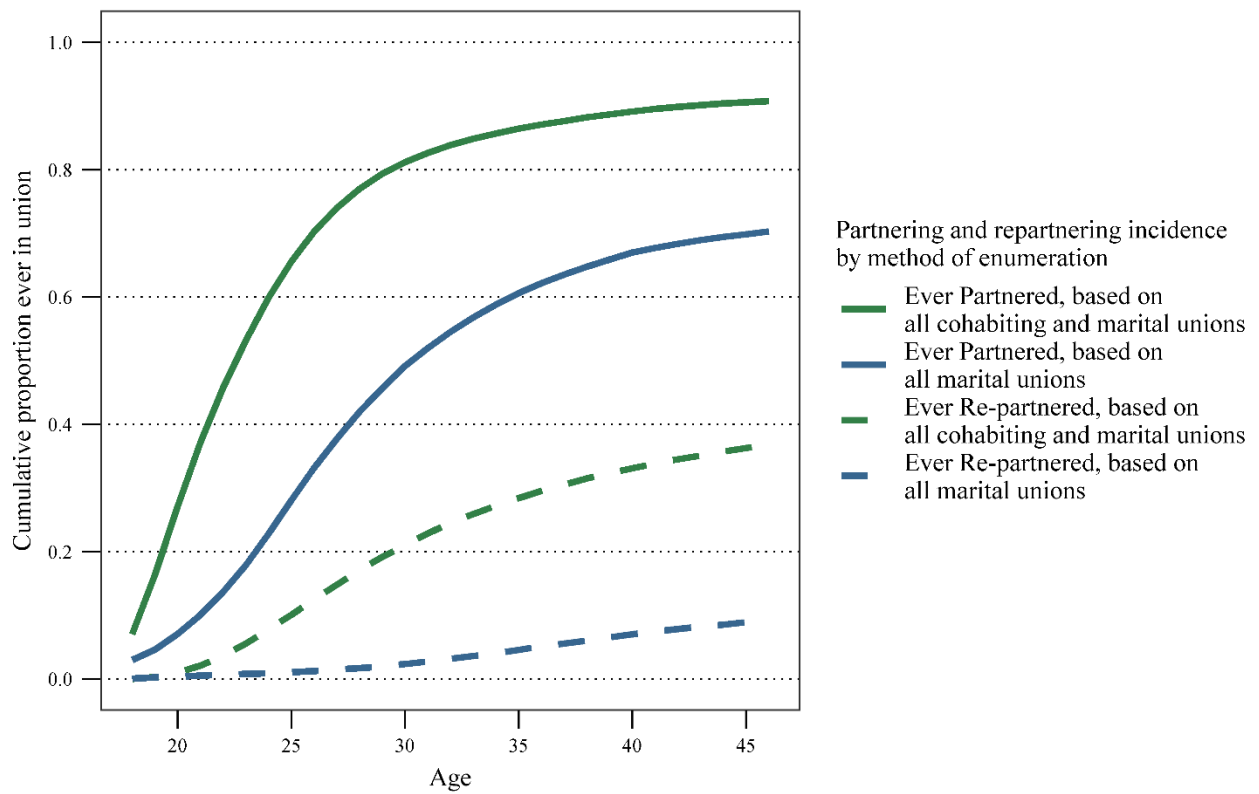

Figure A1. Cumulative fraction ever partnered and ever re-partnering in ages 18 to 46, as estimated from marriages versus from marriages and cohabiting unions

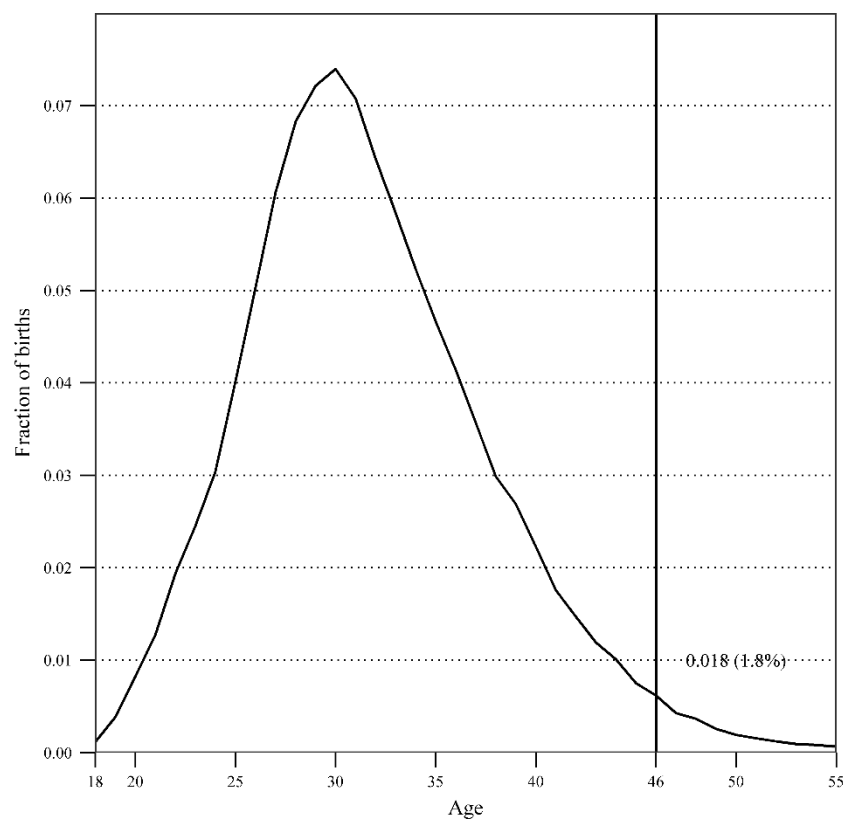

Figure A2. Fraction of births in each one-year category in ages 18–55 for the 1963 male birth cohort.

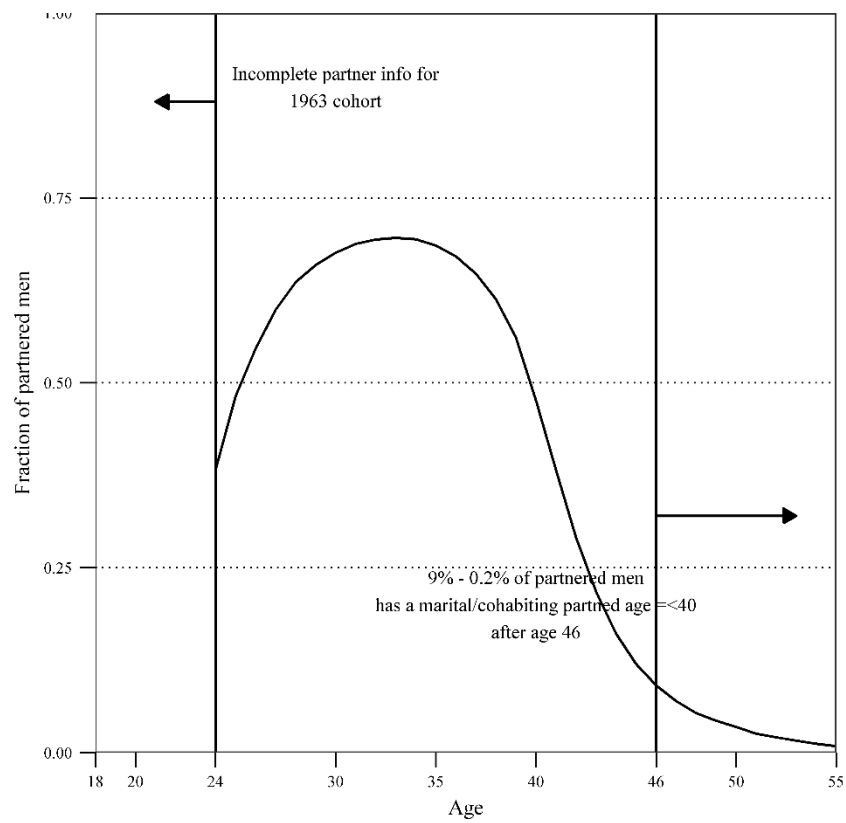

Figure A3. Fraction of (female) partners aged 40 or younger in each one-year category of men aged 24–55 years for the 1963 birth cohort of married or cohabiting men.

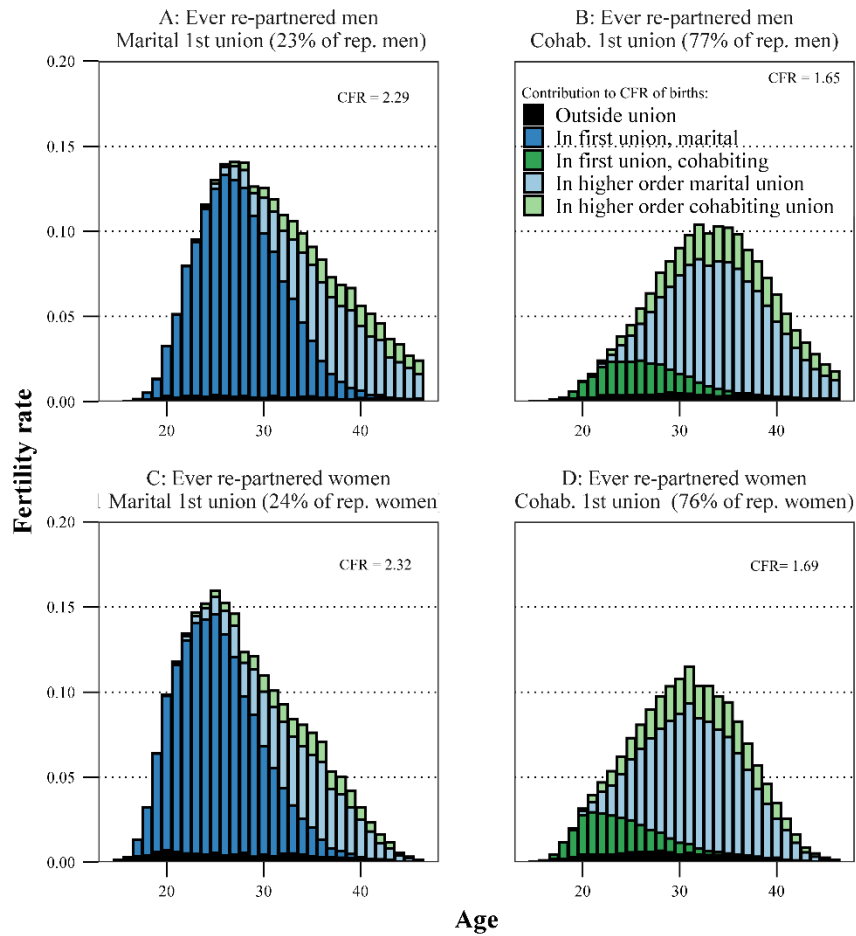

Figure A4. The proportional contribution of births by parentage (union-order) and by union civic status to total cohort fertility. Age-specific fertility rates of (A) ever partnered, first union is marital, men (B) ever re-partnered, first union is cohabiting, men, (C) ever partnered, first union is marital, women, and (D), ever re-partnered, first union is cohabiting, women.

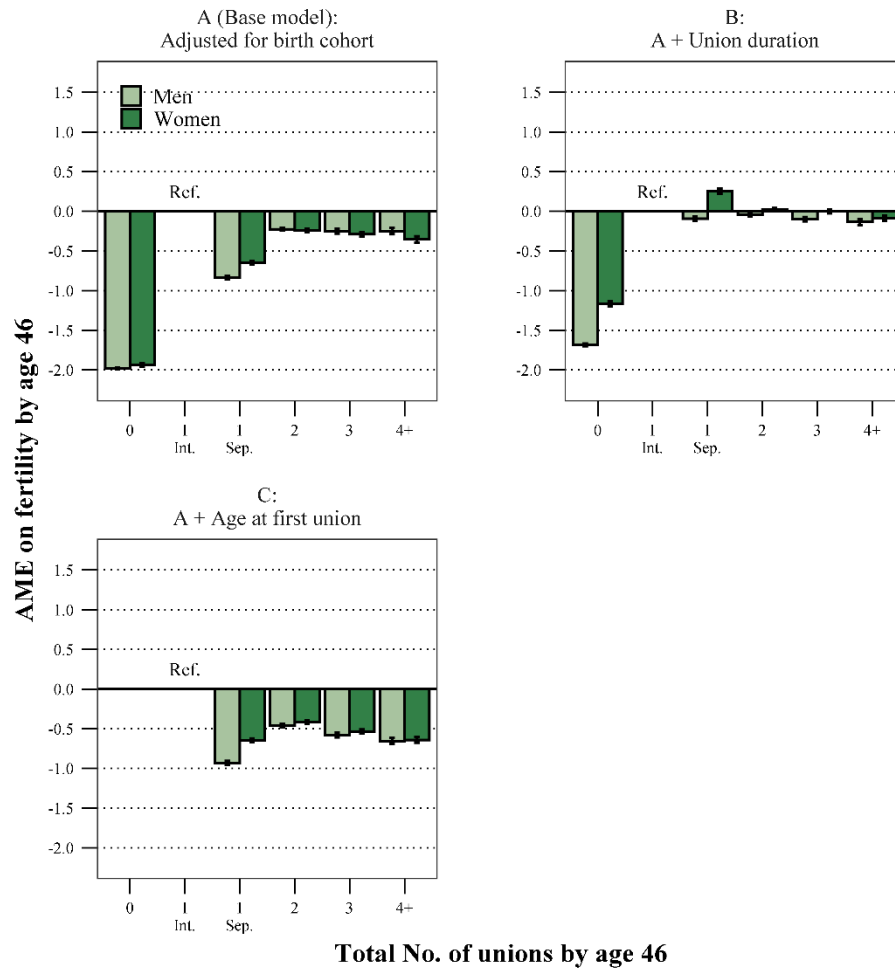

Figure A5. AMEs (95% CIs) of the number of all unions (cohabitations and marriages) on cohort fertility by age 46 for men and women, adjusted for (A) birth cohort (N=239,425), (B) birth cohort and union duration (N=239,425), and (C) birth cohort and age at first union (N=215,981). All models adjusted for parents' socioeconomic position, urban/rural residence, income, and education

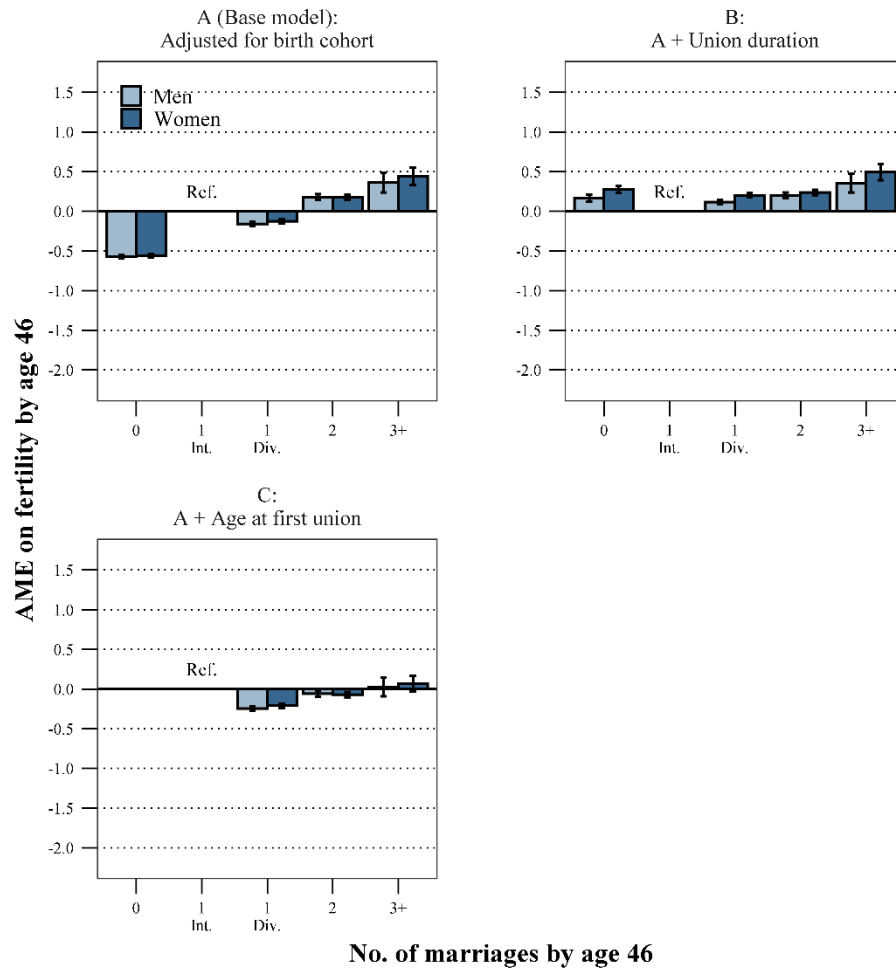

Figure A6. AMEs (with 95% CIs) of the number of marriages on cohort fertility by age 46 for men and women, adjusted for (A) birth cohort (N=239,425), (B) birth cohort and union duration (N=239,425), and (C) birth cohort and age at first union (N=163,700). All models adjusted for parents' socioeconomic position, urban/rural residence, income, and education

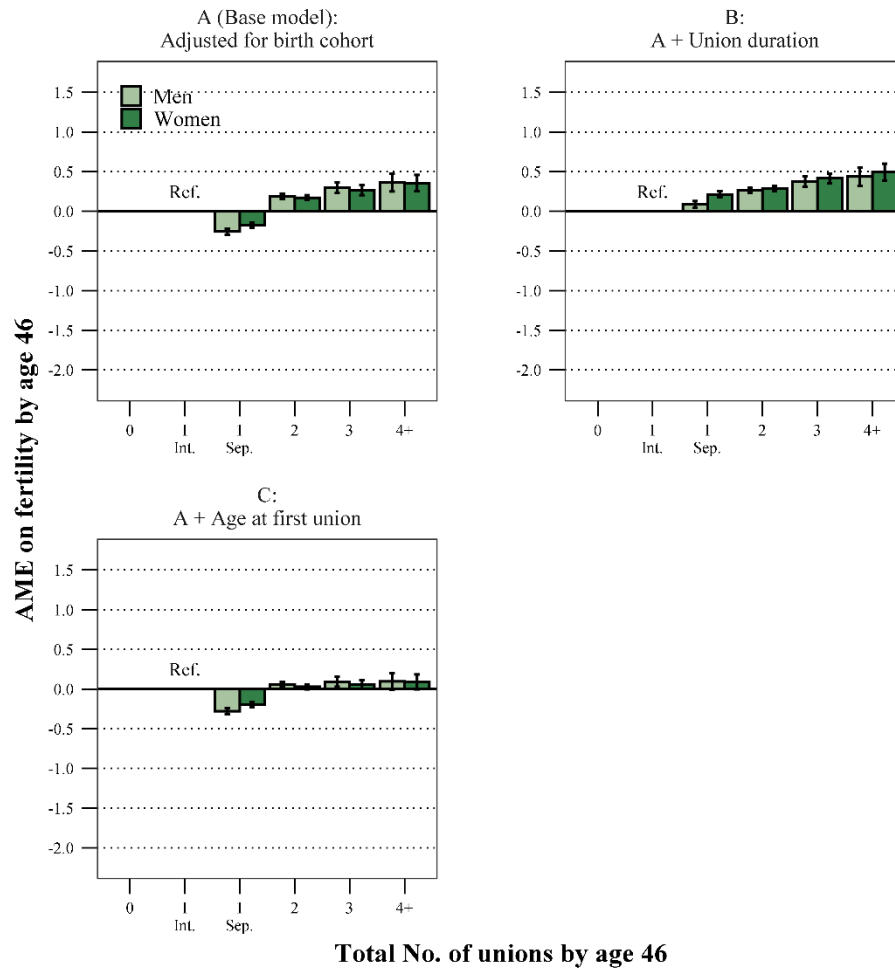

Figure A7. AMEs (95% CIs) of the number of all unions (cohabitations and marriages) on cohort fertility by age 46 for men and women who had at least one child in a first order union by age 46, adjusted for (A) birth cohort (N=129,351), (B) birth cohort and union duration (N=129,351), and (C) birth cohort and age at first union (N=129,351).



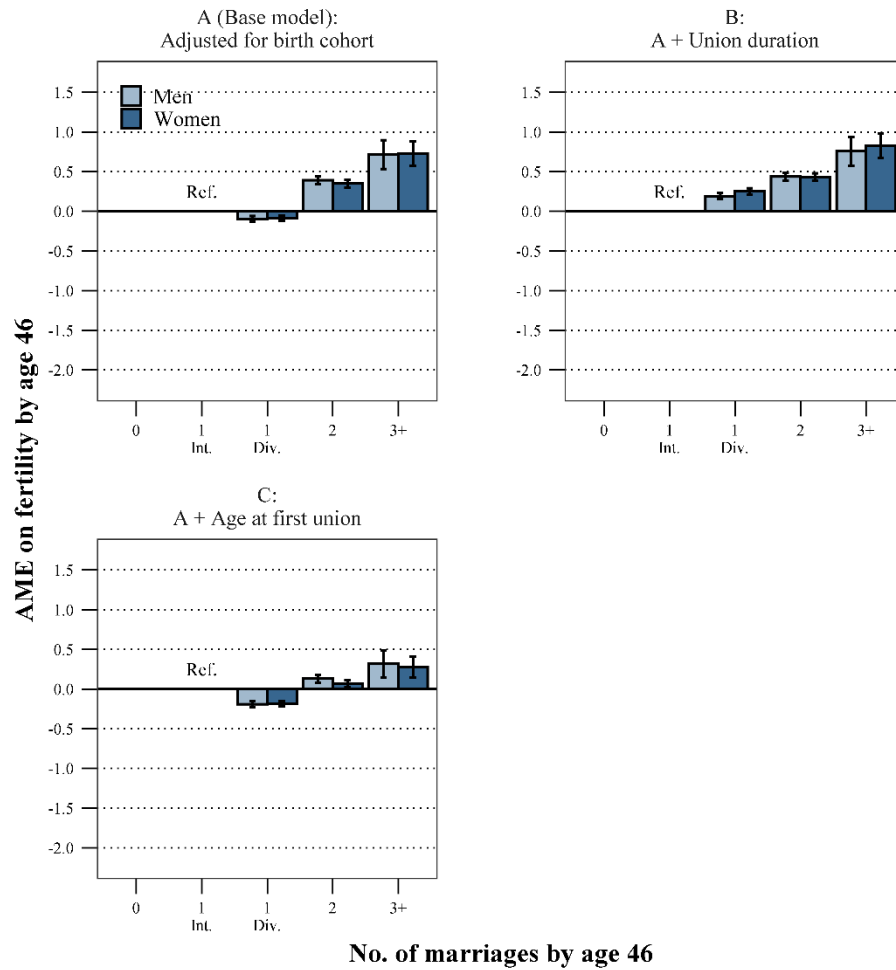

Figure A8. AMEs (with 95% CIs) of the number of marriages on cohort fertility by age 46 for men and women who had at least one child by age 46, adjusted for (A) birth cohort (N=104,340), (B) birth cohort and union duration (N=104,340), and (C) birth cohort and age at first union (N=104,340).



Figure A9. AMEs (with 95% CIs) of the number of all unions (cohabitations and marriages) on cohort fertility by age 46 for men and women who had at least one child by age 46, adjusted for (A) birth cohort (N=128,187), (B) birth cohort, union duration (N=128,187), and (C) birth cohort, age at first union (N=128,187). All models adjusted for parents' socioeconomic position, urban/rural residence, income, and education.

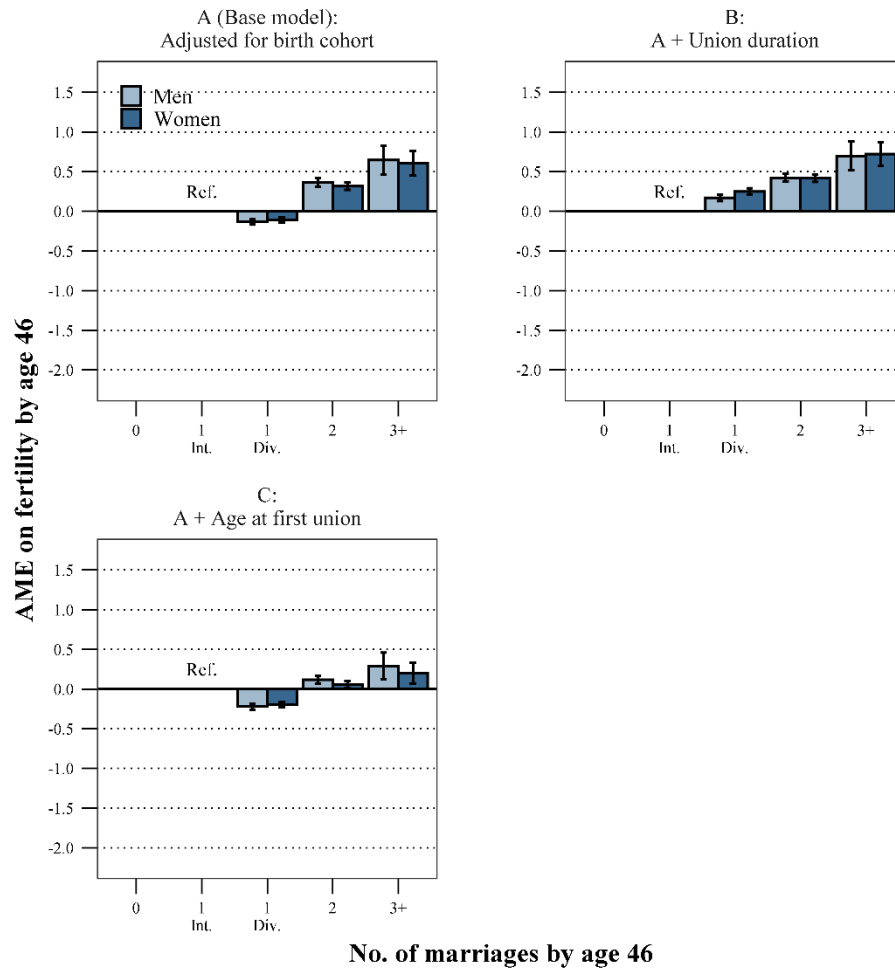

Figure A10. AMEs (with 95% CIs) of the number of marriages on cohort fertility on cohort fertility by age 46 for men and women who had at least one child by age 46, adjusted for (A) birth cohort (N=103,371), (B) birth cohort and union duration (N=103,371), and (C) birth cohort, age at first union (N=103,371). All models adjusted for parents' socioeconomic position, urban/rural residence, income, and education.

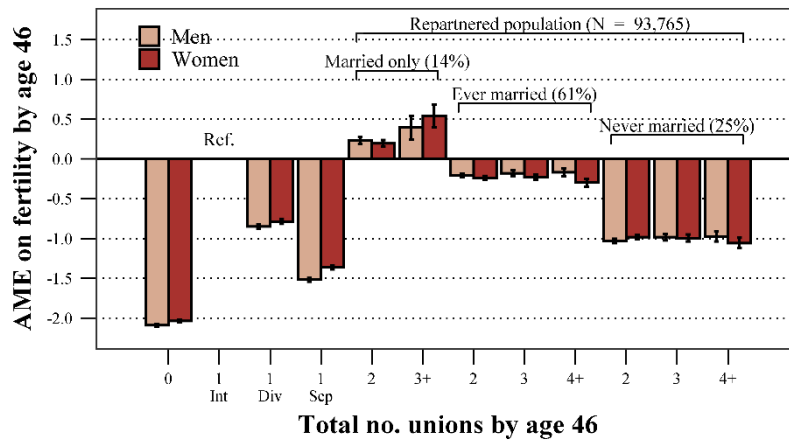

Figure A11. AMEs (with 95% CIs) of the number of all unions (marriages and cohabitations) on cohort fertility by age 46 for men and women by re-partnering trajectory, adjusted for birth cohort, parents' socioeconomic position, urban/rural residence, income and education (N=239,425).

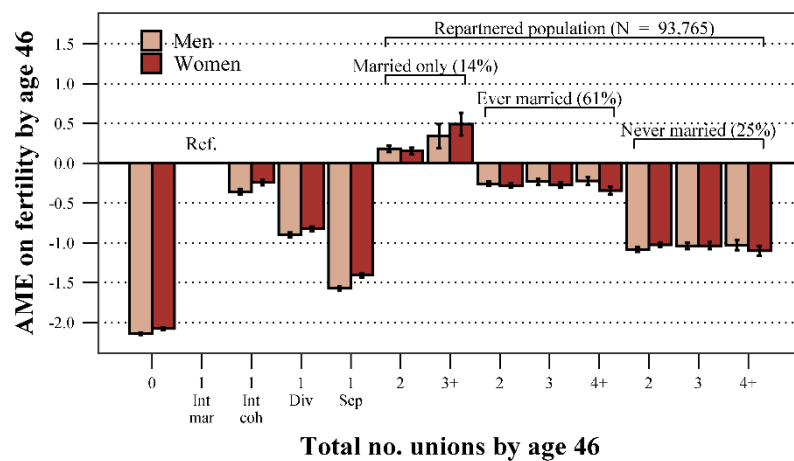

Figure A12. AMEs (with 95% CIs) of the number of all unions (marriages and cohabitations) on cohort fertility by age 46 for men and women by re-partnering trajectory, adjusted for birth cohort, parents' socioeconomic position, urban/rural residence, income and education (N=239,425). Reference category is intact marital unions.

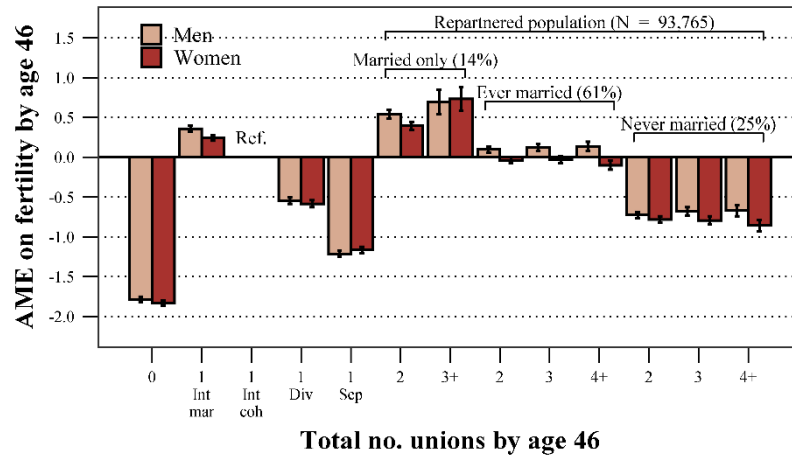

Figure A13. AMEs (95% CIs) of the number of all unions (marriages and cohabitations) on cohort fertility by age 46 for men and women by re-partnering trajectory, adjusted for birth cohort, parents socioeconomic position, urban/rural residence, income and education (N=239,425). Reference category is intact cohabiting unions.

Table A1. Births across number of cumulated unions by age 46, for men and women and by measure of enumeration

| All unions |        | 0 unions    |    | 1 union     |    | 2 unions    |    | 3 unions     |    | 4+ unions |    |
|------------|--------|-------------|----|-------------|----|-------------|----|--------------|----|-----------|----|
|            | parity | N           | %  | N           | %  | N           | %  | N            | %  | N         | %  |
| Men        | 0      | 14525       | 95 | 12027       | 19 | 5518        | 18 | 2049         | 19 | 808       | 18 |
|            | 1      | 478         | 3  | 9241        | 15 | 5985        | 20 | 2440         | 23 | 1114      | 24 |
|            | 2      | 172         | 1  | 23797       | 38 | 10451       | 35 | 3478         | 32 | 1303      | 29 |
|            | 3      | 53          | 0  | 11996       | 19 | 5366        | 18 | 1728         | 16 | 701       | 15 |
|            | 4+     | 19          | 0  | 5227        | 8  | 2737        | 9  | 1132         | 11 | 635       | 14 |
| Women      | 0      | 8643        | 85 | 9600        | 15 | 4936        | 16 | 1977         | 17 | 981       | 20 |
|            | 1      | 950         | 9  | 8716        | 14 | 5837        | 19 | 2371         | 21 | 1107      | 22 |
|            | 2      | 387         | 4  | 25207       | 40 | 11602       | 37 | 3793         | 33 | 1420      | 29 |
|            | 3      | 125         | 1  | 13415       | 21 | 6039        | 19 | 2096         | 18 | 879       | 18 |
|            | 4+     | 53          | 0  | 5976        | 10 | 2977        | 9  | 1161         | 10 | 534       | 11 |
| Marriages  |        | 0 marriages |    | 1 marriages |    | 2 marriages |    | 3+ marriages |    |           |    |
| sex        | parity | N           | %  | N           | %  | N           | %  | N            | %  |           |    |
| Men        | 0      | 26007       | 62 | 8107        | 11 | 770         | 8  | 43           | 20 |           |    |
|            | 1      | 6524        | 15 | 11053       | 16 | 1548        | 17 | 133          | 27 |           |    |
|            | 2      | 6694        | 16 | 29272       | 41 | 3037        | 33 | 198          | 27 |           |    |
|            | 3      | 2280        | 5  | 15260       | 22 | 2138        | 23 | 166          | 15 |           |    |
|            | 4+     | 779         | 1  | 6931        | 10 | 1117        | 19 | 202          | 11 |           |    |
| Women      | 0      | 17928       | 50 | 7285        | 10 | 863         | 8  | 61           | 22 |           |    |
|            | 1      | 7002        | 19 | 10386       | 14 | 1467        | 14 | 126          | 24 |           |    |
|            | 2      | 7586        | 21 | 31178       | 42 | 3393        | 33 | 252          | 26 |           |    |
|            | 3      | 2626        | 7  | 17030       | 23 | 2611        | 26 | 287          | 17 |           |    |
|            | 4+     | 819         | 3  | 7628        | 11 | 1866        | 19 | 288          | 11 |           |    |

Table A2. Descriptive statistics.

|                              | Men<br>(N=122849) | Women<br>(N=120782) | Total<br>(N=243631) |
|------------------------------|-------------------|---------------------|---------------------|
| <i>Age at first union</i>    |                   |                     |                     |
| Mean                         | 25.4              | 23.3                | 24.3                |
| Median                       | 24.0              | 22.0                | 23.0                |
| Q1, Q3                       | 22.0, 28.0        | 20.0, 25.0          | 21.0, 27.0          |
| <i>Age at first marriage</i> |                   |                     |                     |
| Mean                         | 30.1              | 28.0                | 29.0                |
| Median                       | 29.0              | 27.0                | 28.0                |
| Q1, Q3                       | 26.0, 34.0        | 24.0, 32.0          | 25.0, 33.0          |
| <i>Union duration</i>        |                   |                     |                     |
| Mean                         | 18.1              | 19.7                | 18.9                |
| Median                       | 20.0              | 22.0                | 21.0                |
| Q1, Q3                       | 14.0, 23.0        | 16.0, 25.0          | 15.0, 24.0          |
| <i>Marriage duration</i>     |                   |                     |                     |
| Mean                         | 4.2               | 4.5                 | 4.3                 |
| Median                       | 4.0               | 5.0                 | 5.0                 |
| Q1, Q3                       | 3.0, 5.0          | 4.0, 6.0            | 3.0, 5.0            |
| <i>Birth cohort</i>          |                   |                     |                     |
| 1969                         | 32188<br>(26.2%)  | 31573<br>(26.1%)    | 63761<br>(26.2%)    |
| 1970                         | 31200<br>(25.4%)  | 30876<br>(25.6%)    | 62076<br>(25.5%)    |
| 1971                         | 30072<br>(24.5%)  | 29917<br>(24.8%)    | 59989<br>(24.6%)    |
| 1973                         | 29389<br>(23.9%)  | 28416<br>(23.5%)    | 57805<br>(23.7%)    |
| <i>Income quartile</i>       |                   |                     |                     |
| 1st                          | 31186<br>(25.5%)  | 29259<br>(24.5%)    | 60445<br>(25.0%)    |
| 2nd                          | 29398<br>(24.1%)  | 31047<br>(26.0%)    | 60445<br>(25.0%)    |
| 3rd                          | 29913<br>(24.5%)  | 30532<br>(25.5%)    | 60445<br>(25.0%)    |
| 4th                          | 31687<br>(25.9%)  | 28758<br>(24.0%)    | 60445<br>(25.0%)    |
| <i>Educational level</i>     |                   |                     |                     |
| Basic                        | 17816<br>(14.5%)  | 8976<br>(7.4%)      | 26792<br>(11.0%)    |
| Upper secondary              | 57690<br>(47.0%)  | 43924<br>(36.4%)    | 101614<br>(41.7%)   |
| Lower tertiary               | 28704<br>(23.4%)  | 42974<br>(35.6%)    | 71678<br>(29.4%)    |
| Higher tertiary              | 18639<br>(15.2%)  | 24908<br>(20.6%)    | 43547<br>(17.9%)    |



|                                           |                  |                  |                   |
|-------------------------------------------|------------------|------------------|-------------------|
| <i>Parental SES</i>                       |                  |                  |                   |
| Higher service (I)                        | 16062<br>(13.1%) | 15569<br>(12.9%) | 31631<br>(13.0%)  |
| Lower service (I)                         | 26530<br>(21.6%) | 25871<br>(21.4%) | 52401<br>(21.5%)  |
| Higher routine non-manual (IIIa)          | 7188<br>(5.9%)   | 6944<br>(5.7%)   | 14132<br>(5.8%)   |
| Lower routine non-manual (IIIb)           | 18388<br>(15.0%) | 18371<br>(15.2%) | 36759<br>(15.1%)  |
| Small proprietors, no employees<br>(IVb)  | 10074<br>(8.2%)  | 9573<br>(7.9%)   | 19647<br>(8.1%)   |
| Self-employed farmers (IVc)               | 8625<br>(7.0%)   | 8148<br>(6.7%)   | 16773<br>(6.9%)   |
| Lower technicians (V)                     | 31<br>(0.0%)     | 30<br>(0.0%)     | 61<br>(0.0%)      |
| Skilled manual (VI)                       | 8138<br>(6.6%)   | 8164<br>(6.8%)   | 16302<br>(6.7%)   |
| Semi-/unskilled manual (VIIa)             | 9762<br>(7.9%)   | 9765<br>(8.1%)   | 19527<br>(8.0%)   |
| Agricultural workers (VIIb)               | 418<br>(0.3%)    | 408<br>(0.3%)    | 826<br>(0.3%)     |
| Unknown                                   | 17633<br>(14.4%) | 17939<br>(14.9%) | 35572<br>(14.6%)  |
| <i>Municipal characteristics (age 18)</i> |                  |                  |                   |
| Rural/semi-urban                          | 47890<br>(39.4%) | 45663<br>(38.2%) | 93553<br>(38.8%)  |
| Urban                                     | 73562<br>(60.6%) | 73729<br>(61.8%) | 147291<br>(61.2%) |

---

Table A3. Mean and median number of children born by control variables used in multivariate models.

|                                           | Men    |      | Women  |      |
|-------------------------------------------|--------|------|--------|------|
|                                           | median | mean | median | mean |
| <i>Income quartile (at age 46)</i>        |        |      |        |      |
| 1st quartile                              | 1      | 1.15 | 2      | 1.91 |
| 2nd quartile                              | 2      | 1.64 | 2      | 1.95 |
| 3rd quartile                              | 2      | 1.8  | 2      | 1.78 |
| 4th quartile                              | 2      | 1.94 | 2      | 1.63 |
| <i>Educational level (at age 46)</i>      |        |      |        |      |
| Basic                                     | 1      | 1.46 | 2      | 1.78 |
| Upper secondary                           | 2      | 1.57 | 2      | 1.87 |
| Lower tertiary                            | 2      | 1.72 | 2      | 1.78 |
| Higher tertiary                           | 2      | 1.79 | 2      | 1.74 |
| <i>Parental SES</i>                       |        |      |        |      |
| Higher service (I)                        | 2      | 1.69 | 2      | 1.75 |
| Lower service (I)                         | 2      | 1.65 | 2      | 1.78 |
| Higher routine non-manual (IIIa)          | 2      | 1.64 | 2      | 1.8  |
| Lower routine non-manual (IIIb)           | 2      | 1.66 | 2      | 1.87 |
| Small proprietors, no employees (IVb)     | 2      | 1.67 | 2      | 1.81 |
| Self-employed farmers (IVc)               | 2      | 1.67 | 2      | 1.87 |
| Lower technicians (V)                     | 2      | 1.97 | 2      | 2.03 |
| Skilled manual (VI)                       | 2      | 1.59 | 2      | 1.84 |
| Semi-/unskilled manual (VIIa)             | 2      | 1.55 | 2      | 1.84 |
| Agricultural workers (VIIb)               | 2      | 1.61 | 2      | 1.97 |
| Unknown                                   | 1      | 1.47 | 2      | 1.75 |
| <i>Municipal characteristics (age 18)</i> |        |      |        |      |
| Rural/semi-urban                          | 2      | 1.68 | 2      | 1.89 |
| Urban                                     | 2      | 1.59 | 2      | 1.76 |

Table A4. Prevalence of partnering and re-partnering by age 46, total population of men. All marital and cohabiting unions. Percentages in parenthesis.

| Total population                                   |               | Ever-partnered   |             | Re-partnered |
|----------------------------------------------------|---------------|------------------|-------------|--------------|
| <i>Never partnered</i>                             | 15,243 (12)   |                  |             |              |
| <i>Partnered once,<br/>never re-<br/>partnered</i> | 61,973(51)    |                  |             |              |
|                                                    |               | <i>Intact</i>    | 46,683 (43) |              |
|                                                    |               | <i>Separated</i> | 15,290 (14) |              |
|                                                    |               |                  |             |              |
| <i>Ever re-partnered</i>                           | 45,633 (37)   |                  |             |              |
|                                                    |               | <i>2 unions</i>  | 30,325 (28) | (66)         |
|                                                    |               | <i>3 unions</i>  | 10,874 (10) | (24)         |
|                                                    |               | <i>4+ unions</i> | 4,434 (4)   | (10)         |
|                                                    |               |                  |             |              |
|                                                    |               |                  |             |              |
| <i>Total</i>                                       | 122,849 (100) | 107,606 (100)    |             | 45,633 (100) |

Table A5. Prevalence of partnering and re-partnering by age 46, total population of women. All marital and cohabiting unions. Number (percentages).

| Total population                                   |               | Ever-partnered   |             | Re-partnered |
|----------------------------------------------------|---------------|------------------|-------------|--------------|
| <i>Never partnered</i>                             | 10,152 (8)    |                  |             |              |
| <i>Partnered once,<br/>never re-<br/>partnered</i> | 62,498(52)    |                  |             |              |
|                                                    |               | <i>Intact</i>    | 48,353 (44) |              |
|                                                    |               | <i>Separated</i> | 14,145 (13) |              |
|                                                    |               |                  |             |              |
| <i>Ever re-partnered</i>                           | 48,132 (40)   |                  |             |              |
|                                                    |               | <i>2 unions</i>  | 31,731 (29) |              |
|                                                    |               | <i>3 unions</i>  | 11,471 (10) | (66)         |
|                                                    |               | <i>4+ unions</i> | 4,930 (4)   | (24)         |
|                                                    |               | <i>5+ unions</i> | 48,353 (44) | (10)         |
|                                                    |               |                  |             |              |
| <i>Total</i>                                       | 120,132 (100) | 110,630 (100)    |             | 48,132 (100) |

Table A6. Prevalence of higher order unions by union type and union type of the first dissolved union. All ever re-partnered men and women, respectively. Number (percentages).

|                                                |  | Higher order unions  |                  |
|------------------------------------------------|--|----------------------|------------------|
| <i>Men</i>                                     |  | <i>cohabitations</i> | <i>marriages</i> |
| <i>First union cohabitation</i><br>33,194 (73) |  | 26895 (40)           | 24103 (37)       |
| <i>First union marriage</i><br>12,434 (27)     |  | 7481 (11)            | 8207 (12)        |
| <i>Women</i>                                   |  |                      |                  |
| <i>First union cohabitation</i><br>34382 (71)  |  | 27648 (39)           | 25616 (36)       |
| <i>First union marriage</i><br>13746 (29)      |  | 8592 (12)            | 9023 (12)        |

Table A7. Poisson regression of completed fertility on total number of unions (marriages and non-marital cohabitations). Corresponds to Figure 1, Plot A.

|                                                 | Plot A   |         |
|-------------------------------------------------|----------|---------|
|                                                 | b        | se      |
| <i>Sex (Ref. = Men)</i>                         | 1.053*** | (0.005) |
| <i>Number of unions (Ref. = 1 intact union)</i> |          |         |
| 0 unions                                        | 0.034*** | (0.001) |
| 1 union,<br>separated                           | 0.594*** | (0.005) |
| 2 unions                                        | 0.892*** | (0.005) |
| 3 unions                                        | 0.881*** | (0.007) |
| 4+ unions                                       | 0.885*** | (0.010) |
| <i>Sex × no. of unions</i>                      |          |         |
| Women × 0 unions                                | 3.130*** | (0.117) |
| Women × 1 union,<br>separated                   | 1.171*** | (0.013) |
| Women × 2 unions                                | 0.997    | (0.007) |
| Women × 3 unions                                | 0.985    | (0.011) |
| Women × 4+ unions                               | 0.951**  | (0.015) |
| <i>Birth year (Ref. = 1969)</i>                 |          |         |
| 1970                                            | 0.993    | (0.004) |
| 1971                                            | 0.997    | (0.004) |
| 1972                                            | 0.997    | (0.004) |
| <i>Cumulated union duration</i>                 |          |         |
| <i>Age of first union</i>                       |          |         |
| Observations                                    | 243631   |         |
| Pseudo R <sup>2</sup>                           | 0.095    |         |
| chi2                                            | 75928.6  |         |

Exponentiated coefficients, standard errors in brackets, \* p<0.05, \*\* p<0.01, \*\*\* p<0.001

Table A8. Poisson regression of completed fertility on the number of marriages. Corresponds to Figure 1, Plot B.

|                                                                                           | Model A  |         |
|-------------------------------------------------------------------------------------------|----------|---------|
|                                                                                           | b        | se      |
| <i>Sex (Ref. = Men)</i>                                                                   | 1.033*** | (0.004) |
| <i>Number of marriages (Ref. = 1)</i>                                                     |          |         |
| 0 marriages                                                                               | 0.337*** | (0.002) |
| 1 marriage,<br>divorced                                                                   | 0.905*** | (0.006) |
| 2 marriages                                                                               | 1.109*** | (0.008) |
| 3 marriages                                                                               | 1.238*** | (0.028) |
| <i>Sex × no. of marriages</i>                                                             |          |         |
| Women × 0 marriages                                                                       | 1.284*** | (0.011) |
| Women × 1 marriage,<br>divorced                                                           | 1.022*   | (0.009) |
| Women × 2 marriages                                                                       | 0.983    | (0.010) |
| Women × 3+ marriages                                                                      | 1.017    | (0.030) |
| <i>Birth year (Ref. = 1969)</i>                                                           |          |         |
| 1970                                                                                      | 0.993    | (0.004) |
| 1971                                                                                      | 0.996    | (0.004) |
| 1972                                                                                      | 0.997    | (0.004) |
| <i>Cumulated marriage duration</i>                                                        |          |         |
| <i>Age of first marriage</i>                                                              |          |         |
| Observations                                                                              | 243631   |         |
| Pseudo R <sup>2</sup>                                                                     | 0.080    |         |
| chi2                                                                                      | 64243.4  |         |
| Exponentiated coefficients, standard errors in brackets, * p<0.05, ** p<0.01, *** p<0.001 |          |         |

Table A9. Poisson regression of completed fertility on total number of unions (marriages and non-marital cohabitations) adjusted for control variables. Corresponds to Figure A5.

|                                                                | A        |         | B        |         | C        |         |
|----------------------------------------------------------------|----------|---------|----------|---------|----------|---------|
|                                                                | b        | se      | b        | se      | b        | se      |
| <i>Sex (Ref. = Men)</i>                                        | 1.057*** | (0.005) | 0.937*** | (0.004) | 0.936*** | (0.004) |
| <i>Number of unions (Ref. = 1 intact union)</i>                |          |         |          |         |          |         |
| 0 union                                                        | 0.033*** | (0.001) | 0.090*** | (0.003) |          |         |
| 1 union,<br>separated                                          | 0.591*** | (0.005) | 0.950*** | (0.008) | 0.595*** | (0.005) |
| 2 unions                                                       | 0.890*** | (0.005) | 0.977*** | (0.005) | 0.801*** | (0.004) |
| 3 unions                                                       | 0.877*** | (0.007) | 0.946*** | (0.007) | 0.747*** | (0.006) |
| 4+ unions                                                      | 0.879*** | (0.010) | 0.927*** | (0.011) | 0.716*** | (0.008) |
| <i>Sex × no. of unions</i>                                     |          |         |          |         |          |         |
| Women × 0 unions                                               | 3.230*** | (0.126) | 3.654*** | (0.143) |          |         |
| Women × 1 union,<br>separated                                  | 1.184*** | (0.013) | 1.209*** | (0.014) | 1.176*** | (0.013) |
| Women × 2 union                                                | 0.998    | (0.007) | 1.037*** | (0.008) | 1.006    | (0.007) |
| Women × 3 union                                                | 0.987    | (0.011) | 1.056*** | (0.012) | 1.006    | (0.011) |
| Women × 4+ union                                               | 0.953**  | (0.015) | 1.024    | (0.016) | 0.981    | (0.016) |
| <i>Birth year (Ref. = 1969)</i>                                |          |         |          |         |          |         |
| 1970                                                           | 0.991*   | (0.004) | 0.989*   | (0.004) | 0.990*   | (0.004) |
| 1971                                                           | 0.995    | (0.004) | 0.990*   | (0.004) | 0.991*   | (0.004) |
| 1972                                                           | 0.995    | (0.004) | 0.987**  | (0.004) | 0.987**  | (0.004) |
| <i>Urban/Rural residence<br/>at age 18<br/>(Ref.=Urban)</i>    | 0.951*** | (0.003) | 1.043*** | (0.004) | 1.059*** | (0.004) |
| <i>Income quartile (Ref. = 1<sup>st</sup> income quartile)</i> |          |         |          |         |          |         |
| 2nd quartile                                                   | 1.009*   | (0.005) | 0.938*** | (0.004) | 0.987**  | (0.005) |
| 3rd quartile                                                   | 0.987**  | (0.005) | 0.901*** | (0.004) | 0.956*** | (0.004) |
| 4th quartile                                                   | 0.976*** | (0.005) | 0.875*** | (0.004) | 0.938*** | (0.005) |
| <i>Educational level (Ref. = basic education)</i>              |          |         |          |         |          |         |
| Upper secondary                                                | 0.969*** | (0.005) | 0.949*** | (0.005) | 0.995    | (0.006) |
| Lower tertiary                                                 | 0.941*** | (0.006) | 0.950*** | (0.006) | 1.009    | (0.006) |
| Higher tertiary                                                | 0.950*** | (0.006) | 1.019**  | (0.007) | 1.082*** | (0.007) |
| <i>Parental socioeconomic position (EGP)</i>                   |          |         |          |         |          |         |
| II                                                             | 0.988*   | (0.005) | 0.983**  | (0.005) | 0.983**  | (0.005) |
| IIIa                                                           | 0.991    | (0.008) | 0.987    | (0.008) | 0.984*   | (0.008) |
| IIIb                                                           | 0.999    | (0.006) | 0.978*** | (0.006) | 0.980**  | (0.006) |
| IVb                                                            | 0.984*   | (0.007) | 0.975*** | (0.007) | 0.972*** | (0.007) |
| IVc                                                            | 1.008    | (0.008) | 1.018*   | (0.008) | 1.026*** | (0.008) |
| V                                                              | 1.056    | (0.096) | 1.023    | (0.093) | 1.000    | (0.091) |
| VI                                                             | 0.982*   | (0.007) | 0.960*** | (0.007) | 0.961*** | (0.007) |
| VIIa                                                           | 0.978**  | (0.007) | 0.965*** | (0.007) | 0.961*** | (0.007) |



|                                 |          |         |          |         |          |         |
|---------------------------------|----------|---------|----------|---------|----------|---------|
| VIIIb                           | 1.008    | (0.027) | 0.995    | (0.026) | 0.992    | (0.026) |
| Unknown                         | 0.964*** | (0.006) | 0.957*** | (0.006) | 0.950*** | (0.006) |
| <i>Cumulated union duration</i> |          |         | 1.051*** | (0.000) |          |         |
| <i>Age of first union</i>       |          |         |          |         | 0.951*** | (0.000) |
| Observations                    | 239425   |         | 239425   |         | 215981   |         |
| Pseudo R <sup>2</sup>           | 0.091    |         | 0.128    |         | 0.035    |         |
| chi2                            | 71783.6  |         | 101079.9 |         | 24708.3  |         |

Exponentiated coefficients, standard errors in brackets, \* p<0.05, \*\* p<0.01, \*\*\* p<0.001.

Table A10. Poisson regression of completed fertility on total number of marriages adjusted for control variables. Corresponds to Figure A6.

|                                                                | A        |         | B        |         | C        |         |
|----------------------------------------------------------------|----------|---------|----------|---------|----------|---------|
|                                                                | b        | se      | b        | se      | b        | se      |
| <i>Sex (Ref. = Men)</i>                                        | 1.043*** | (0.004) | 0.976*** | (0.004) | 0.964*** | (0.004) |
| <i>Number of unions (Ref. = 1 intact union)</i>                |          |         |          |         |          |         |
| 0 marriages                                                    | 0.336*** | (0.002) | 0.607*** | (0.006) |          |         |
| 1 marriage,<br>separated                                       | 0.896*** | (0.006) | 1.108*** | (0.008) | 0.843*** | (0.006) |
| 2 marriages                                                    | 1.105*** | (0.008) | 1.126*** | (0.008) | 0.939*** | (0.007) |
| 3+ marriages                                                   | 1.220*** | (0.028) | 1.223*** | (0.028) | 0.973    | (0.023) |
| <i>Sex × no. of unions</i>                                     |          |         |          |         |          |         |
| Women × 0 marriages                                            | 1.311*** | (0.012) | 1.403*** | (0.013) |          |         |
| Women × 1 marriage,<br>separated                               | 1.026**  | (0.009) | 1.062*** | (0.009) | 1.021*   | (0.009) |
| Women × 2 marriage                                             | 0.981    | (0.010) | 1.012    | (0.010) | 0.977*   | (0.010) |
| Women × 3+ marriage                                            | 1.019    | (0.031) | 1.071*   | (0.032) | 1.011    | (0.031) |
| <i>Birth year (Ref. = 1969)</i>                                |          |         |          |         |          |         |
| 1970                                                           | 0.991*   | (0.004) | 0.991*   | (0.004) | 0.998    | (0.005) |
| 1971                                                           | 0.995    | (0.004) | 0.993    | (0.004) | 1.006    | (0.005) |
| 1972                                                           | 0.995    | (0.004) | 0.992    | (0.004) | 1.007    | (0.005) |
| <i>Urban/Rural residence<br/>at age 18<br/>(Ref.=Urban)</i>    | 0.951*** | (0.003) | 1.045*** | (0.004) | 1.059*** | (0.004) |
| <i>Income quartile (Ref. = 1<sup>st</sup> income quartile)</i> |          |         |          |         |          |         |
| 2nd quartile                                                   | 1.044*** | (0.005) | 1.018*** | (0.005) | 0.971*** | (0.005) |
| 3rd quartile                                                   | 1.015**  | (0.005) | 0.982*** | (0.005) | 0.939*** | (0.005) |
| 4th quartile                                                   | 0.995    | (0.005) | 0.956*** | (0.005) | 0.913*** | (0.005) |
| <i>Educational level (Ref. = basic education)</i>              |          |         |          |         |          |         |
| Upper secondary                                                | 0.957*** | (0.005) | 0.943*** | (0.005) | 0.982**  | (0.006) |
| Lower tertiary                                                 | 0.910*** | (0.005) | 0.904*** | (0.005) | 0.961*** | (0.007) |
| Higher tertiary                                                | 0.896*** | (0.006) | 0.913*** | (0.006) | 0.971*** | (0.007) |
| <i>Parental socioeconomic position (EGP)</i>                   |          |         |          |         |          |         |
| II                                                             | 1.063*** | (0.004) | 1.054*** | (0.004) | 1.045*** | (0.004) |
| IIIa                                                           | 0.996    | (0.005) | 0.995    | (0.005) | 0.989    | (0.006) |
| IIIb                                                           | 1.006    | (0.008) | 1.006    | (0.008) | 0.996    | (0.008) |
| IVb                                                            | 1.020*** | (0.006) | 1.014*   | (0.006) | 0.995    | (0.006) |
| IVc                                                            | 1.005    | (0.007) | 1.001    | (0.007) | 0.983*   | (0.008) |
| V                                                              | 1.019*   | (0.008) | 1.017*   | (0.008) | 1.013    | (0.008) |
| VI                                                             | 1.138    | (0.103) | 1.132    | (0.103) | 1.139    | (0.111) |
| VIIa                                                           | 1.009    | (0.008) | 1.000    | (0.008) | 0.984    | (0.008) |
| VIIb                                                           | 1.009    | (0.007) | 1.004    | (0.007) | 0.985    | (0.008) |

|                                    |         |         |          |         |          |         |
|------------------------------------|---------|---------|----------|---------|----------|---------|
| Unknown                            | 1.059*  | (0.028) | 1.052    | (0.028) | 1.002    | (0.030) |
| <i>Cumulated marriage duration</i> |         |         | 1.031*** | (0.000) |          |         |
| <i>Age of first marriage</i>       |         |         |          |         | 0.967*** | (0.000) |
| Observations                       | 239425  |         | 239425   |         | 163700   |         |
| Pseudo R <sup>2</sup>              | 0.079   |         | 0.091    |         | 0.026    |         |
| chi2                               | 62087.7 |         | 71784.1  |         | 13953.9  |         |

Exponentiated coefficients, standard errors in brackets, \* p<0.05, \*\* p<0.01, \*\*\* p<0.001.

Table A11. Poisson regression of completed fertility on total number of unions (marriages and non-marital cohabitations) for individuals who had at least one child in a first order union by age 46. Corresponds to Figure A7, Models A, B and C.

|                                                 | A        |         | B        |         | C        |         |
|-------------------------------------------------|----------|---------|----------|---------|----------|---------|
|                                                 | b        | se      | b        | se      | b        | se      |
| <i>Sex (Ref. = Men)</i>                         | 1.022*** | (0.005) | 0.980*** | (0.004) | 0.974*** | (0.004) |
| <i>Number of unions (Ref. = 1 intact union)</i> |          |         |          |         |          |         |
| 1 union,<br>separated                           | 0.891*** | (0.008) | 1.036*** | (0.009) | 0.887*** | (0.008) |
| 2 unions                                        | 1.080*** | (0.007) | 1.113*** | (0.008) | 1.023*** | (0.007) |
| 3 unions                                        | 1.127*** | (0.014) | 1.160*** | (0.015) | 1.038**  | (0.013) |
| 4+ unions                                       | 1.152*** | (0.024) | 1.186*** | (0.025) | 1.040    | (0.022) |
| <i>Sex × no. of unions</i>                      |          |         |          |         |          |         |
| Women × 1 union,<br>separated                   | 1.040*** | (0.012) | 1.054*** | (0.012) | 1.035**  | (0.012) |
| Women × 2 union                                 | 0.992    | (0.009) | 1.010    | (0.010) | 0.989    | (0.009) |
| Women × 3 union                                 | 0.985    | (0.017) | 1.018    | (0.018) | 0.986    | (0.017) |
| Women × 4+ union                                | 0.995    | (0.028) | 1.024    | (0.029) | 0.999    | (0.028) |
| <i>Birth year (Ref. = 1969)</i>                 |          |         |          |         |          |         |
| 1970                                            | 0.996    | (0.005) | 0.996    | (0.005) | 0.997    | (0.005) |
| 1971                                            | 1.002    | (0.005) | 1.001    | (0.005) | 1.003    | (0.005) |
| 1972                                            | 1.000    | (0.005) | 0.998    | (0.005) | 1.000    | (0.005) |
| <i>Cumulated union duration</i>                 |          |         | 1.021*** | (0.000) |          |         |
| <i>Age of first union</i>                       |          |         |          |         | 0.976*** | (0.000) |
| Observations                                    | 129351   |         | 129351   |         | 129351   |         |
| Pseudo R <sup>2</sup>                           | 0.002    |         | 0.010    |         | 0.009    |         |
| chi2                                            | 931.3    |         | 4190.7   |         | 3801.7   |         |

Exponentiated coefficients, standard errors in brackets, \* p<0.05, \*\* p<0.01, \*\*\* p<0.001.

Table A12. Poisson regression of completed fertility on total number of marriages for individuals who had at least one child in a first order union by age 46. Corresponds to Figure A8, Models A, B and C.

|                                                    | A        |         | B        |         | C        |         |
|----------------------------------------------------|----------|---------|----------|---------|----------|---------|
|                                                    | b        | se      | b        | se      | b        | se      |
| <i>Sex (Ref. = Men)</i>                            | 1.021*** | (0.005) | 0.987**  | (0.005) | 0.976*** | (0.005) |
| <i>Number of unions (Ref. = 1 intact marriage)</i> |          |         |          |         |          |         |
| 1 marriage,<br>separated                           | 0.960*** | (0.007) | 1.081*** | (0.009) | 0.925*** | (0.007) |
| 2 marriages                                        | 1.162*** | (0.011) | 1.183*** | (0.011) | 1.052*** | (0.010) |
| 3 marriages+                                       | 1.296*** | (0.038) | 1.316*** | (0.039) | 1.125*** | (0.034) |
| <i>Sex × no. of unions</i>                         |          |         |          |         |          |         |
| Women × 1 marriage,<br>separated                   | 1.004    | (0.010) | 1.024*   | (0.011) | 1.000    | (0.010) |
| Women × 2 marriages                                | 0.982    | (0.012) | 1.000    | (0.013) | 0.977    | (0.012) |
| Women × 3+<br>marriages                            | 0.998    | (0.039) | 1.024    | (0.040) | 0.988    | (0.039) |
| <i>Birth year (Ref. = 1969)</i>                    |          |         |          |         |          |         |
| 1970                                               | 0.996    | (0.005) | 0.995    | (0.005) | 0.999    | (0.005) |
| 1971                                               | 1.001    | (0.006) | 0.999    | (0.006) | 1.007    | (0.006) |
| 1972                                               | 0.999    | (0.006) | 0.996    | (0.006) | 1.006    | (0.006) |
| <i>Cumulated marriage duration</i>                 |          |         | 1.017*** | (0.000) |          |         |
| <i>Age of first marriage</i>                       |          |         |          |         | 0.977*** | (0.000) |
| Observations                                       | 104340   |         | 104340   |         | 104316   |         |
| Pseudo R <sup>2</sup>                              | 0.002    |         | 0.007    |         | 0.012    |         |
| chi2                                               | 791.0    |         | 2431.3   |         | 4068.2   |         |

Exponentiated coefficients, standard errors in brackets, \* p<0.05, \*\* p<0.01, \*\*\* p<0.001.

Table A13. Poisson regression of completed fertility on total number of unions (marriages and non-marital cohabitations) for individuals who had at least one child in a first order union by age 46. Adjusted for control variables. Corresponds to Figure A9, Models A, B and C.

|                                                                | A        |         | B        |         | C        |         |
|----------------------------------------------------------------|----------|---------|----------|---------|----------|---------|
|                                                                | b        | se      | b        | se      | b        | se      |
| <i>Sex (Ref. = Men)</i>                                        | 1.019*** | (0.005) | 0.967*** | (0.005) | 0.960*** | (0.005) |
| <i>Number of unions (Ref. = 1 intact union)</i>                |          |         |          |         |          |         |
| 1 union,<br>separated                                          | 0.875*** | (0.008) | 1.026**  | (0.009) | 0.875*** | (0.008) |
| 2 unions                                                       | 1.070*** | (0.007) | 1.108*** | (0.008) | 1.019**  | (0.007) |
| 3 unions                                                       | 1.105*** | (0.014) | 1.144*** | (0.015) | 1.028*   | (0.013) |
| 4+ unions                                                      | 1.117*** | (0.024) | 1.154*** | (0.024) | 1.018    | (0.022) |
| <i>Sex × no. of unions</i>                                     |          |         |          |         |          |         |
| Women × 1 union,<br>separated                                  | 1.053*** | (0.012) | 1.069*** | (0.012) | 1.047*** | (0.012) |
| Women × 2 union                                                | 0.993    | (0.010) | 1.015    | (0.010) | 0.992    | (0.010) |
| Women × 3 union                                                | 0.986    | (0.017) | 1.023    | (0.018) | 0.989    | (0.017) |
| Women × 4+ union                                               | 0.993    | (0.028) | 1.026    | (0.029) | 1.000    | (0.029) |
| <i>Birth year (Ref. = 1969)</i>                                |          |         |          |         |          |         |
| 1970                                                           | 0.997    | (0.005) | 0.996    | (0.005) | 0.996    | (0.005) |
| 1971                                                           | 1.003    | (0.005) | 1.002    | (0.005) | 1.002    | (0.005) |
| 1972                                                           | 1.001    | (0.005) | 0.998    | (0.005) | 0.999    | (0.005) |
| <i>Urban/Rural residence<br/>at age 18<br/>(Ref.=Urban)</i>    | 0.951*** | (0.003) | 1.045*** | (0.004) | 1.059*** | (0.004) |
| <i>Income quartile (Ref. = 1<sup>st</sup> income quartile)</i> |          |         |          |         |          |         |
| 2nd quartile                                                   | 1.044*** | (0.005) | 1.018*** | (0.005) | 0.971*** | (0.005) |
| 3rd quartile                                                   | 1.015**  | (0.005) | 0.982*** | (0.005) | 0.939*** | (0.005) |
| 4th quartile                                                   | 0.995    | (0.005) | 0.956*** | (0.005) | 0.913*** | (0.005) |
| <i>Educational level (Ref. = basic education)</i>              |          |         |          |         |          |         |
| Upper secondary                                                | 0.957*** | (0.005) | 0.943*** | (0.005) | 0.982**  | (0.006) |
| Lower tertiary                                                 | 0.910*** | (0.005) | 0.904*** | (0.005) | 0.961*** | (0.007) |
| Higher tertiary                                                | 0.896*** | (0.006) | 0.913*** | (0.006) | 0.971*** | (0.007) |
| <i>Parental socioeconomic position (EGP)</i>                   |          |         |          |         |          |         |
| II                                                             | 0.989    | (0.006) | 0.987*   | (0.006) | 0.986*   | (0.006) |
| IIIa                                                           | 0.988    | (0.009) | 0.988    | (0.009) | 0.985    | (0.009) |
| IIIb                                                           | 0.987    | (0.007) | 0.981**  | (0.007) | 0.977*** | (0.007) |
| IVb                                                            | 0.983*   | (0.008) | 0.980*   | (0.008) | 0.977**  | (0.008) |
| IVc                                                            | 1.011    | (0.009) | 1.019*   | (0.009) | 1.021*   | (0.009) |
| V                                                              | 1.121    | (0.118) | 1.115    | (0.117) | 1.102    | (0.116) |
| VI                                                             | 0.974**  | (0.009) | 0.967*** | (0.008) | 0.961*** | (0.008) |

|                                 |         |         |          |         |          |         |
|---------------------------------|---------|---------|----------|---------|----------|---------|
| VIIa                            | 0.974** | (0.008) | 0.969*** | (0.008) | 0.963*** | (0.008) |
| VIIb                            | 0.994   | (0.030) | 0.995    | (0.030) | 0.985    | (0.030) |
| Unknown                         | 0.987   | (0.007) | 0.984*   | (0.007) | 0.978**  | (0.007) |
| <i>Cumulated union duration</i> |         |         | 1.023*** | (0.000) |          |         |
| <i>Age of first union</i>       |         |         |          |         | 0.975*** | (0.000) |
| Observations                    | 128187  |         | 128187   |         | 128187   |         |
| Pseudo R <sup>2</sup>           | 0.004   |         | 0.013    |         | 0.012    |         |
| chi2                            | 1685.7  |         | 5180.4   |         | 4644.2   |         |

Exponentiated coefficients, standard errors in brackets, \* p<0.05, \*\* p<0.01, \*\*\* p<0.001.

Table A14. Poisson regression of completed fertility on total number marriages for individuals who had at least one child in a first order union by age 46. Adjusted for control variables. Corresponds to Figure A10, Models A, B and C.

|                                                                | A        |         | B        |         | C        |         |
|----------------------------------------------------------------|----------|---------|----------|---------|----------|---------|
|                                                                | b        | se      | b        | se      | b        | se      |
| <i>Sex (Ref. = Men)</i>                                        | 1.017*** | (0.005) | 0.976*** | (0.005) | 0.968*** | (0.005) |
| <i>Number of marriages (Ref. = 1 intact marriage)</i>          |          |         |          |         |          |         |
| 1 marriage,<br>separated                                       | 0.945*** | (0.007) | 1.071*** | (0.009) | 0.913*** | (0.007) |
| 2 marriages                                                    | 1.150*** | (0.011) | 1.175*** | (0.011) | 1.047*** | (0.010) |
| 3+ marriages                                                   | 1.266*** | (0.038) | 1.290*** | (0.039) | 1.114*** | (0.034) |
| <i>Sex × no. of unions</i>                                     |          |         |          |         |          |         |
| Women × 1 marriage,<br>separated                               | 1.012    | (0.011) | 1.034**  | (0.011) | 1.008    | (0.011) |
| Women × 2 marriages                                            | 0.981    | (0.013) | 1.001    | (0.013) | 0.978    | (0.012) |
| Women × 3+<br>marriages                                        | 0.984    | (0.038) | 1.013    | (0.040) | 0.972    | (0.038) |
| <i>Birth year (Ref. = 1969)</i>                                |          |         |          |         |          |         |
| 1970                                                           | 0.997    | (0.005) | 0.996    | (0.005) | 0.999    | (0.005) |
| 1971                                                           | 1.002    | (0.006) | 1.000    | (0.006) | 1.008    | (0.006) |
| 1972                                                           | 1.001    | (0.006) | 0.997    | (0.006) | 1.007    | (0.006) |
| <i>Urban/Rural residence<br/>at age 18<br/>(Ref.=Urban)</i>    |          |         |          |         |          |         |
|                                                                | 1.049*** | (0.004) | 1.049*** | (0.004) | 1.044*** | (0.004) |
| <i>Income quartile (Ref. = 1<sup>st</sup> income quartile)</i> |          |         |          |         |          |         |
| 2nd quartile                                                   | 0.942*** | (0.006) | 0.927*** | (0.006) | 0.942*** | (0.006) |
| 3rd quartile                                                   | 0.908*** | (0.006) | 0.889*** | (0.005) | 0.906*** | (0.006) |
| 4th quartile                                                   | 0.894*** | (0.006) | 0.871*** | (0.006) | 0.887*** | (0.006) |
| <i>Educational level (Ref. = basic education)</i>              |          |         |          |         |          |         |
| Upper secondary                                                | 0.965*** | (0.008) | 0.963*** | (0.008) | 0.978**  | (0.008) |
| Lower tertiary                                                 | 0.934*** | (0.008) | 0.946*** | (0.008) | 0.961*** | (0.008) |
| Higher tertiary                                                | 0.939*** | (0.008) | 0.975**  | (0.009) | 0.977**  | (0.009) |
| <i>Parental socioeconomic position (EGP)</i>                   |          |         |          |         |          |         |
| II                                                             | 0.990    | (0.007) | 0.989    | (0.007) | 0.991    | (0.007) |
| IIIa                                                           | 0.991    | (0.010) | 0.990    | (0.010) | 0.992    | (0.010) |
| IIIb                                                           | 0.992    | (0.008) | 0.986    | (0.008) | 0.991    | (0.008) |
| IVb                                                            | 0.986    | (0.009) | 0.983    | (0.009) | 0.986    | (0.009) |
| IVc                                                            | 1.017    | (0.010) | 1.023*   | (0.010) | 1.020*   | (0.010) |
| V                                                              | 1.173    | (0.136) | 1.167    | (0.135) | 1.155    | (0.134) |
| VI                                                             | 0.978*   | (0.009) | 0.972**  | (0.009) | 0.981*   | (0.009) |
| VIIa                                                           | 0.979*   | (0.009) | 0.974**  | (0.009) | 0.983    | (0.009) |
| VIIb                                                           | 1.000    | (0.035) | 0.998    | (0.035) | 0.999    | (0.035) |



|                                    |        |         |          |         |          |         |
|------------------------------------|--------|---------|----------|---------|----------|---------|
| Unknown                            | 0.992  | (0.008) | 0.989    | (0.008) | 0.990    | (0.008) |
| <i>Cumulated marriage duration</i> |        |         | 1.018*** | (0.000) |          |         |
| <i>Age of first marriage</i>       |        |         |          |         | 0.977*** | (0.000) |
| Observations                       | 103371 |         | 103371   |         | 103351   |         |
| Pseudo R <sup>2</sup>              | 0.005  |         | 0.010    |         | 0.015    |         |
| chi2                               | 1646.5 |         | 3341.8   |         | 4792.5   |         |

Exponentiated coefficients, standard errors in brackets, \* p<0.05, \*\* p<0.01, \*\*\* p<0.001.

Table A15. Poisson regression of completed fertility on union trajectory. Corresponds to Figure 3.

|                                                                    | b        | se      |
|--------------------------------------------------------------------|----------|---------|
| <i>Sex (Ref. = Men)</i>                                            | 1.043*** | (0.005) |
| <i>Union trajectory (Ref. = 1 intact union)</i>                    |          |         |
| 0 unions                                                           | 0.032*** | (0.001) |
| 1 marriage, divorced                                               | 0.621*** | (0.006) |
| 1 cohabitation, separated                                          | 0.305*** | (0.004) |
| 2 marriages (marriage only)                                        | 1.111*** | (0.010) |
| 3+ marriages (marriages only)                                      | 1.206*** | (0.036) |
| 2 ever married (at least one cohabitation & one marriage)          | 0.908*** | (0.006) |
| 3 ever married (at least one cohabitation & one marriage)          | 0.927*** | (0.008) |
| 4+ ever married (at least one cohabitation & one marriage)         | 0.945*** | (0.012) |
| 2 Never married                                                    | 0.536*** | (0.006) |
| 3 Never married                                                    | 0.560*** | (0.010) |
| 4+ Never married                                                   | 0.566*** | (0.015) |
| <i>Sex × union trajectory</i>                                      |          |         |
| Women × 0 unions                                                   | 3.160*** | (0.118) |
| Women × 1 marriage, divorced                                       | 1.066*** | (0.016) |
| Women × 1 cohabitation, separated                                  | 1.308*** | (0.026) |
| Women × 2 marriages (marriage only)                                | 0.983    | (0.012) |
| Women × 3+ marriages (marriages only)                              | 1.046    | (0.041) |
| Women × 2 ever married (at least one cohabitation & one marriage)  | 0.988    | (0.009) |
| Women × 3 ever married (at least one cohabitation & one marriage)  | 0.977    | (0.012) |
| Women × 4+ ever married (at least one cohabitation & one marriage) | 0.937*** | (0.016) |
| Women × 2 Never married                                            | 1.071*** | (0.016) |
| Women × 3 Never married                                            | 1.017    | (0.025) |
| Women × 4+ Never married                                           | 0.965    | (0.036) |
| <i>Birth year (Ref. = 1969)</i>                                    |          |         |
| 1970                                                               | 0.993    | (0.004) |
| 1971                                                               | 0.997    | (0.004) |
| 1972                                                               | 0.998    | (0.004) |
| Observations                                                       | 243631   |         |
| Pseudo R <sup>2</sup>                                              | 0.120    |         |
| chi2                                                               | 96281.5  |         |

Exponentiated coefficients, standard errors in brackets, \* p&lt;0.05, \*\* p&lt;0.01, \*\*\* p&lt;0.001.

Table A16. Poisson regression of completed fertility on union trajectory. Adjusted for control variables Corresponds to Figure A11.

|                                                                    | b        | se      |
|--------------------------------------------------------------------|----------|---------|
| <i>Sex (Ref. = Men)</i>                                            | 1.049*** | (0.005) |
| <i>Union trajectory (Ref. = 1 intact union)</i>                    |          |         |
| 0 unions                                                           | 0.030*** | (0.001) |
| 1 marriage, divorced                                               | 0.606*** | (0.006) |
| 1 cohabitation, separated                                          | 0.295*** | (0.004) |
| 2 marriages (marriage only)                                        | 1.108*** | (0.010) |
| 3+ marriages (marriages only)                                      | 1.182*** | (0.036) |
| 2 ever married (at least one cohabitation & one marriage)          | 0.904*** | (0.006) |
| 3 ever married (at least one cohabitation & one marriage)          | 0.917*** | (0.008) |
| 4+ ever married (at least one cohabitation & one marriage)         | 0.922*** | (0.012) |
| 2 Never married                                                    | 0.522*** | (0.006) |
| 3 Never married                                                    | 0.544*** | (0.010) |
| 4+ Never married                                                   | 0.548*** | (0.015) |
| <i>Sex × union trajectory</i>                                      |          |         |
| Women × 0 unions                                                   | 3.302*** | (0.129) |
| Women × 1 marriage, divorced                                       | 1.077*** | (0.016) |
| Women × 1 cohabitation, separated                                  | 1.346*** | (0.027) |
| Women × 2 marriages (marriage only)                                | 0.980    | (0.012) |
| Women × 3+ marriages (marriages only)                              | 1.047    | (0.042) |
| Women × 2 ever married (at least one cohabitation & one marriage)  | 0.990    | (0.009) |
| Women × 3 ever married (at least one cohabitation & one marriage)  | 0.980    | (0.012) |
| Women × 4+ ever married (at least one cohabitation & one marriage) | 0.941*** | (0.017) |
| Women × 2 Never married                                            | 1.085*** | (0.017) |
| Women × 3 Never married                                            | 1.031    | (0.025) |
| Women × 4+ Never married                                           | 0.972    | (0.037) |
| <i>Birth year (Ref. = 1969)</i>                                    |          |         |
| 1970                                                               | 0.993    | (0.004) |
| 1971                                                               | 0.998    | (0.004) |
| 1972                                                               | 0.998    | (0.004) |
| <i>Urban/Rural residence at age 18 (Ref.=Urban)</i>                | 1.055*** | (0.004) |
| <i>Income quartile (Ref. = 1<sup>st</sup> income quartile)</i>     |          |         |
| 2nd quartile                                                       | 0.987**  | (0.004) |
| 3rd quartile                                                       | 0.958*** | (0.004) |
| 4th quartile                                                       | 0.938*** | (0.005) |
| <i>Educational level (Ref. = basic education)</i>                  |          |         |
| Upper secondary                                                    | 0.950*** | (0.005) |
| Lower tertiary                                                     | 0.906*** | (0.005) |
| Higher tertiary                                                    | 0.901*** | (0.006) |

---

|                                              |          |         |
|----------------------------------------------|----------|---------|
| <i>Parental socioeconomic position (EGP)</i> |          |         |
| II                                           | 0.992    | (0.005) |
| IIIa                                         | 0.999    | (0.008) |
| IIIb                                         | 1.010    | (0.006) |
| IVb                                          | 0.993    | (0.007) |
| IVc                                          | 1.019*   | (0.008) |
| V                                            | 1.091    | (0.099) |
| VI                                           | 0.997    | (0.008) |
| VIIa                                         | 0.998    | (0.007) |
| VIIIb                                        | 1.040    | (0.028) |
| Unknown                                      | 0.978*** | (0.006) |
| Observations                                 | 239425   |         |
| Pseudo R <sup>2</sup>                        | 0.117    |         |
| chi2                                         | 92528.9  |         |

---

Exponentiated coefficients, standard errors in brackets, \* p<0.05, \*\* p<0.01, \*\*\* p<0.001.

Table A17. Poisson regression of completed fertility on union trajectory. Reference category is intact marital unions. Adjusted for control variables. Corresponds to Figure A12.

|                                                                    | b        | se      |
|--------------------------------------------------------------------|----------|---------|
| <i>Sex (Ref. = Men)</i>                                            | 1.044*** | (0.005) |
| <i>Union trajectory (Ref. = 1 intact marriage)</i>                 |          |         |
| 0 unions                                                           | 0.030*** | (0.001) |
| 1 Intact cohabitation                                              | 0.838*** | (0.008) |
| 1 marriage, divorced                                               | 0.592*** | (0.006) |
| 1 cohabitation, separated                                          | 0.288*** | (0.004) |
| 2 marriages (marriages only)                                       | 1.083*** | (0.010) |
| 3+ marriages (marriages only)                                      | 1.154*** | (0.035) |
| 2 ever married (at least one cohabitation & one marriage)          | 0.883*** | (0.006) |
| 3 ever married (at least one cohabitation & one marriage)          | 0.895*** | (0.008) |
| 4+ ever married (at least one cohabitation & one marriage)         | 0.900*** | (0.012) |
| 2 Never married                                                    | 0.509*** | (0.006) |
| 3 Never married                                                    | 0.531*** | (0.009) |
| 4+ Never married                                                   | 0.534*** | (0.014) |
| <i>Sex × union trajectory</i>                                      |          |         |
| Women × 0                                                          | 3.324*** | (0.130) |
| Women × 1 Intact cohabitation                                      | 1.068*** | (0.014) |
| Women × 1 marriage, divorced                                       | 1.084*** | (0.016) |
| Women × 1 cohabitation, separated                                  | 1.356*** | (0.027) |
| Women × 2 marriages (marriages only)                               | 0.985    | (0.013) |
| Women × 3+ marriages (marriages only)                              | 1.052    | (0.042) |
| Women × 2 ever married (at least one cohabitation & one marriage)  | 0.995    | (0.009) |
| Women × 3 ever married (at least one cohabitation & one marriage)  | 0.985    | (0.012) |
| Women × 4+ ever married (at least one cohabitation & one marriage) | 0.946**  | (0.017) |
| Women × 2 Never married                                            | 1.092*** | (0.017) |
| Women × 3 Never married                                            | 1.038    | (0.025) |
| Women × 4+ Never married                                           | 0.978    | (0.037) |
| <i>Birth year (Ref. = 1969)</i>                                    |          |         |
| 1970                                                               | 0.993    | (0.004) |
| 1971                                                               | 0.998    | (0.004) |
| 1972                                                               | 0.999    | (0.004) |
| <i>Urban/Rural residence at age 18 (Ref.=Urban)</i>                | 1.053*** | (0.004) |
| <i>Income quartile (Ref. = 1<sup>st</sup> income quartile)</i>     |          |         |
| 2nd quartile                                                       | 0.983*** | (0.004) |
| 3rd quartile                                                       | 0.953*** | (0.004) |
| 4th quartile                                                       | 0.933*** | (0.005) |
| <i>Educational level (Ref. = basic education)</i>                  |          |         |

|                                              |          |         |
|----------------------------------------------|----------|---------|
| Upper secondary                              | 0.948*** | (0.005) |
| Lower tertiary                               | 0.902*** | (0.005) |
| Higher tertiary                              | 0.897*** | (0.006) |
| <i>Parental socioeconomic position (EGP)</i> |          |         |
| II                                           | 0.992    | (0.005) |
| IIIa                                         | 0.999    | (0.008) |
| IIIb                                         | 1.009    | (0.006) |
| IVb                                          | 0.992    | (0.007) |
| IVc                                          | 1.016*   | (0.008) |
| V                                            | 1.088    | (0.099) |
| VI                                           | 0.996    | (0.008) |
| VIIa                                         | 0.998    | (0.007) |
| VIIb                                         | 1.040    | (0.028) |
| Unknown                                      | 0.978*** | (0.006) |
| Observations                                 | 239425   |         |
| Pseudo R <sup>2</sup>                        | 0.083    |         |
| chi2                                         | 65904.3  |         |

Exponentiated coefficients, standard errors in brackets, \* p<0.05, \*\* p<0.01, \*\*\* p<0.001.

Table A18. Poisson regression of completed fertility on union trajectory. Reference category is intact marital unions. Adjusted for control variables. Corresponds to Figure A13.

|                                                                    | b        | se      |
|--------------------------------------------------------------------|----------|---------|
| <i>Sex (Ref. = Men)</i>                                            | 1.115*** | (0.014) |
| <i>Union trajectory (Ref. = 1 intact non-marital cohabitation)</i> |          |         |
| 0 unions                                                           | 0.035*** | (0.001) |
| 1 intact marriage                                                  | 1.193*** | (0.012) |
| 1 marriage, divorce                                                | 0.706*** | (0.010) |
| 1 cohabitation, separated                                          | 0.343*** | (0.006) |
| 2 marriages (marriages only)                                       | 1.292*** | (0.016) |
| 3+ marriages (marriages only)                                      | 1.377*** | (0.043) |
| 2 ever married (at least one cohabitation & one marriage)          | 1.053*** | (0.011) |
| 3 ever married (at least one cohabitation & one marriage)          | 1.068*** | (0.013) |
| 4+ ever married (at least one cohabitation & one marriage)         | 1.074*** | (0.017) |
| 2 Never married                                                    | 0.608*** | (0.009) |
| 3 Never married                                                    | 0.633*** | (0.012) |
| 4+ Never married                                                   | 0.637*** | (0.018) |
| <i>Sex × union trajectory</i>                                      |          |         |
| Women × 0 unions                                                   | 3.112*** | (0.127) |
| Women × 1 Intact marriage                                          | 0.936*** | (0.012) |
| Women × 1 marriage, divorced                                       | 1.014    | (0.019) |
| Women × 1 cohabitation, separated                                  | 1.269*** | (0.029) |
| Women × 2 marriages (marriages only)                               | 0.922*** | (0.016) |
| Women × 3+ marriages (marriages only)                              | 0.985    | (0.041) |
| Women × 2 ever married (at least one cohabitation & one marriage)  | 0.932*** | (0.013) |
| Women × 3 ever married (at least one cohabitation & one marriage)  | 0.923*** | (0.015) |
| Women × 4+ ever married (at least one cohabitation & one marriage) | 0.886*** | (0.019) |
| Women × 2 Never married                                            | 1.022    | (0.019) |
| Women × 3 Never married                                            | 0.971    | (0.026) |
| Women × 4+ Never married                                           | 0.916*   | (0.036) |
| <i>Birth year (Ref. = 1969)</i>                                    |          |         |
| 1970                                                               | 0.993    | (0.004) |
| 1971                                                               | 0.998    | (0.004) |
| 1972                                                               | 0.999    | (0.004) |
| <i>Urban/Rural residence at age 18 (Ref.=Urban)</i>                | 1.053*** | (0.004) |
| <i>Income quartile (Ref. = 1<sup>st</sup> income quartile)</i>     |          |         |
| 2nd quartile                                                       | 0.983*** | (0.004) |
| 3rd quartile                                                       | 0.953*** | (0.004) |
| 4th quartile                                                       | 0.933*** | (0.005) |
| <i>Educational level (Ref. = basic education)</i>                  |          |         |
| Upper secondary                                                    | 0.948*** | (0.005) |

|                                              |          |         |
|----------------------------------------------|----------|---------|
| Lower tertiary                               | 0.902*** | (0.005) |
| Higher tertiary                              | 0.897*** | (0.006) |
| <i>Parental socioeconomic position (EGP)</i> |          |         |
| II                                           | 0.992    | (0.005) |
| IIIa                                         | 0.999    | (0.008) |
| IIIb                                         | 1.009    | (0.006) |
| IVb                                          | 0.992    | (0.007) |
| IVc                                          | 1.016*   | (0.008) |
| V                                            | 1.088    | (0.099) |
| VI                                           | 0.996    | (0.008) |
| VIIa                                         | 0.998    | (0.007) |
| VIIIb                                        | 1.040    | (0.028) |
| Unknown                                      | 0.978*** | (0.006) |
| Observations                                 | 239425   |         |
| Pseudo R <sup>2</sup>                        | 0.118    |         |
| chi2                                         | 93039.5  |         |

Exponentiated coefficients, standard errors in brackets, \* p<0.05, \*\* p<0.01, \*\*\* p<0.001.
